# Supplementary material for: The Participation of 3,3,3-Trichloro-1-nitroprop-1-ene in the [3 + 2] Cycloaddition Reaction with Selected Nitrile N-Oxides in the Light of the Experimental and MEDT Quantum Chemical Study
Source: MDPI journal article supplement (doi:10.3390/molecules26226774), 2021-11-09
Supplement: s1 [file s1]

---

## SUPPLEMENTARY MATERIALS

---

The participation of 3,3,3-trichloro-1-nitroprop-1-ene in the [3+2] cycloaddition reaction with selected nitrile N-oxides in the light of the experimental and MEDT quantum chemical study

**Karolina Zawadzińska<sup>1</sup>, Mar Ríos-Gutiérrez<sup>2\*</sup>, Karolina Kula<sup>1</sup>,  
Przemysław Woliński<sup>1</sup>, Barbara Mirosław<sup>3</sup>, Tomasz Krawczyk<sup>4</sup>,  
and Radomir Jasiński<sup>1\*</sup>**

<sup>1</sup> Department of Organic Chemistry and Technology, Cracow University of Technology, Warszawska 24, 31-155 Cracow, Poland.

<sup>2</sup> Department of Organic Chemistry, University of Valencia, Dr. Moliner 50, Burjassot, 46100 Valencia, Spain.

<sup>3</sup> Department of General and Coordination Chemistry and Crystallography, Maria Curie-Skłodowska University in Lublin, Pl. Marii Curie-Skłodowskiej 3, 20-031 Lublin, Poland.

<sup>4</sup> Department of Chemical Organic Technology and Petrochemistry, Silesian University of Technology, Krzywoustego 4, 44-100 Gliwice, Poland.

\* Correspondence: rios@utopia.uv.es (M.R.G.);  
radomir@chemia.pk.edu.pl (R.J.)

---

## INDEX

|    |                                                                                                                                                                                                                                                                                                                                                                     |
|----|---------------------------------------------------------------------------------------------------------------------------------------------------------------------------------------------------------------------------------------------------------------------------------------------------------------------------------------------------------------------|
| 3  | MATERIALS                                                                                                                                                                                                                                                                                                                                                           |
| 3  | ANALYTICAL TECHNIQUES                                                                                                                                                                                                                                                                                                                                               |
| 3  | X-RAY CRYSTAL STRUCTURE DETERMINATION                                                                                                                                                                                                                                                                                                                               |
| 3  | GENERAL PROCEDURE FOR CYCLOADDITION REACTIONS                                                                                                                                                                                                                                                                                                                       |
| 4  | PHYSICAL CHARACTERISTICS OF SYNTHESIZED 2-ISOXAZOLINE                                                                                                                                                                                                                                                                                                               |
| 16 | Table S1 – Crystal X-Ray diffraction data for $\Delta^2$ -isoxazoline ( <b>3a</b> )                                                                                                                                                                                                                                                                                 |
| 17 | Table S2 – Bond lengths (Å) and valence angles (°) for $\Delta^2$ -isoxazoline ( <b>3a</b> )                                                                                                                                                                                                                                                                        |
| 17 | Table S3 – Geometry of interactions in of crystal $\Delta^2$ -isoxazoline ( <b>3a</b> )                                                                                                                                                                                                                                                                             |
| 18 | Table S4 – Populations of the most relevant ELF valence basins of NOs <b>1a,c,d</b> , in average number of electrons, $\bar{e}$ .                                                                                                                                                                                                                                   |
| 18 | Table S5 – B3LYP/6-31G(d) HOMO and LUMO energies used for the calculation of the global CDFT indices of NOs <b>1a-e</b> , in eV.                                                                                                                                                                                                                                    |
| 18 | Table S6 – Nucleophilic $P_k^-$ Parr functions at the O1 and C3 atoms of NOs <b>1a,c,d</b> .                                                                                                                                                                                                                                                                        |
| 19 | Table S7 – $\omega$ B97X-D/6-311G(d,p) electronic energies in gas phase and in tetrahydrofuran (THF), in a.u., of the reagents and stationary points involved in the 32CA reactions of NOs <b>1a-e</b> with TNP <b>2</b> .                                                                                                                                          |
| 20 | Table S8 – $\omega$ B97X-D/6-311G(d,p) enthalpies (H, in a.u.), entropies (S, in cal·mol <sup>-1</sup> K <sup>-1</sup> ), and Gibbs free energies (G, in a.u.), and the relative ones with respect to the separated reagents, computed at 25 °C, in THF, of the reagents and stationary points involved in the 32CA reaction of NOs <b>1a-e</b> with TNP <b>2</b> . |
| 21 | Figure S1 – $\omega$ B97X-D/6-311G(d,p) optimized geometries, in THF, of the regioisomeric TSs involved in the 32CA reaction of NOs <b>1a,c,d</b> with TNP <b>2</b> .                                                                                                                                                                                               |
| 22 | Figure S2 – $\omega$ B97X-D/6-311G(d,p) intrinsic reaction coordinate paths, in THF, of the 32CA reactions between NOs <b>1a,e</b> and TNP <b>2</b> .                                                                                                                                                                                                               |



## MATERIALS

All hydroxamoyl chlorides (**1a-e**) and (*E*)-3,3,3-trichloro-1-nitroprop-1-ene (TNP) **2** were prepared in reactions described earlier in literature [1-3]. Commercially available solvents were used as reaction medium.

## ANALYTICAL TECHNIQUES

For reaction testing, a Knauer apparatus equipped with UV-VIS detector, and Lichrospher 100-5 RP18 column (4 x 250) was applied. Methanol – water mixtures (70:30 v/v) were used as eluent at the flow rate 1.0 cm<sup>3</sup> min<sup>-1</sup>. Melting points were determined on the Boetius apparatus and were not corrected. IR spectra were registered on a FTS Nicolet IS 10 apparatus. <sup>1</sup>H NMR (400 MHz) and <sup>13</sup>C NMR (100 MHz) spectra were taken on an Agilent 400 MHz spectrometer using CDCl<sub>3</sub> as a solvent. HR-MS spectra were performed on a Waters Xevo G2 QToF instrument using ESI ionization. Spectrum recording was determined for the 200-500nm range by usage of spectrometer UV-5100 BIOSENS.

## X-RAY CRYSTAL STRUCTURE DETERMINATION

The diffraction intensities were collected at room temperature with the use of SuperNova X-ray diffractometer with Atlas S2 CCD detector using the mirror-monochromatized CuK $\alpha$  radiation ( $\lambda$ = 1.54184 Å). The phase problem was solved by direct methods using the SHELXS-97 program and the structure model refined by the full-matrix least-squares method on F<sup>2</sup> using the SHELXL-97 program implemented in Olex2.refine package [4,5].

## GENERAL PROCEDURE FOR CYCLOADDITION REACTIONS

Erlenmeyer flask was put in an ice bath. The 10 ml of THF was dosed, then 0,003 mole 3,3,3-trichloro-1-nitroprop-1-ene **2** and 0,0024 mole of proper hydroxamoyl chloride (**1a-e**) was added and stirred for 10 min. Next the 0,0015 mole K<sub>2</sub>CO<sub>3</sub> was dosed in small amounts for 30 min. After that time, the ice bath was removed. Change of mixture colour and turbidity was observed. The mixture was left for 24 hours. The mixture was left to solvent evaporation, next the main product was washed off with diethyl ether, solid side product doesn't dissolve in ether. Ether was then evaporated due to usage of vacuum distillation. The obtained semisolid mass was washed by could petroleum eter and crystallised from ethanol. A white crystalline solid was obtained.

## PHYSICAL CHARACTERISTICS OF SYNTHESIZED 2-ISOXAZOLINE

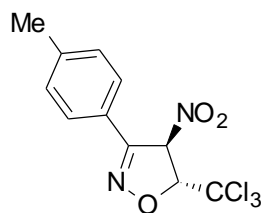

### 4,5-*trans*-3-(4-methylphenyl)-4-nitro-5-trichloromethyl- $\Delta^2$ -isoxazoline (3a)

$C_{11}H_9N_2O_3Cl_3$ . White crystal needles obtained in 68.85% yield; m.p. 78 – 80°C from ethanol; IR:  $\nu$  = 1563 and 1366 ( $NO_2$ ), 1259 ( $-C-O-N-$ ), 1610 ( $-C=N-$ ), 805 ( $C(Cl_2)-Cl$ )  $cm^{-1}$ ; UV 265 nm;  $^1H$  NMR (400 MHz,  $CDCl_3$ ):  $\delta$  7.7 (d, 2H,  $J=8.61Hz$ ); 7.3 (d, 2H,  $J=8.61Hz$ ); 6.4 (d, 1H,  $J=3.91Hz$ ); 5.7 (d, 1H,  $J=3.91Hz$ ); 2.4 (s, 3H);  $^{13}C$  NMR (100 MHz,  $CDCl_3$ ):  $\delta$  151.6; 142.6; 130; 126.9; 94.2; 93.2; 21.5; HR-MS (ESI-): calculated for  $C_{11}H_8N_2O_3Cl_3$   $[M-H]^-$  = 320.96005, found 320.9601;

### IR

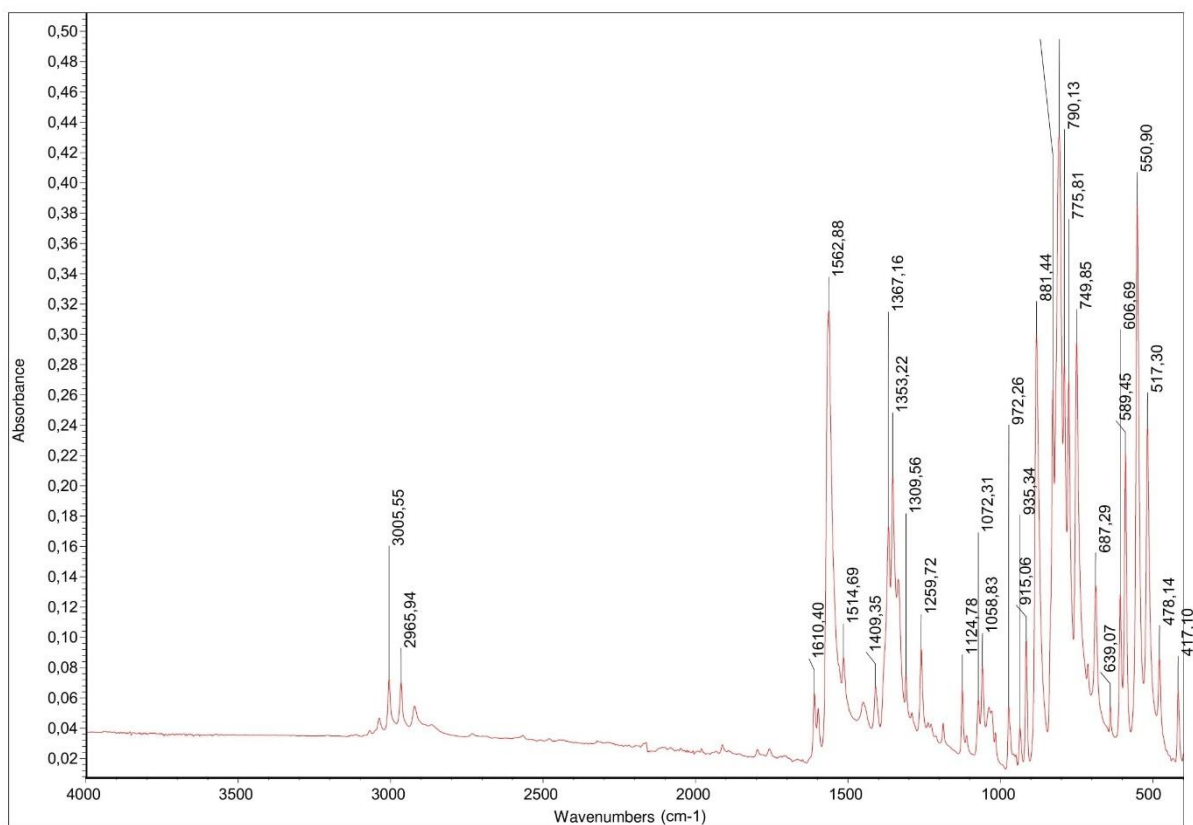

## $^1\text{H}$ NMR

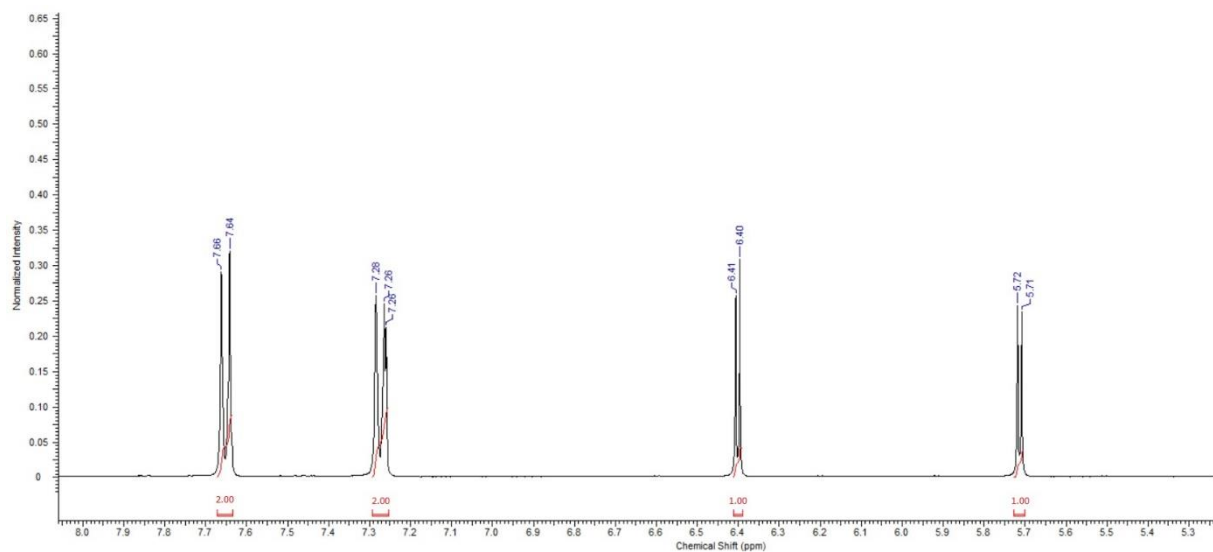

## $^{13}\text{C}$ NMR

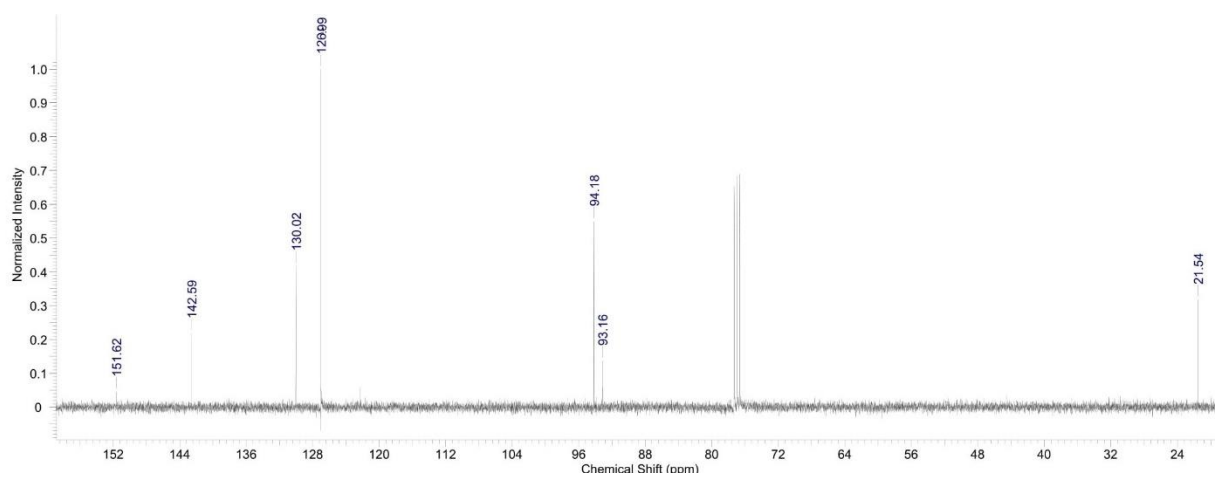

## HR-MS

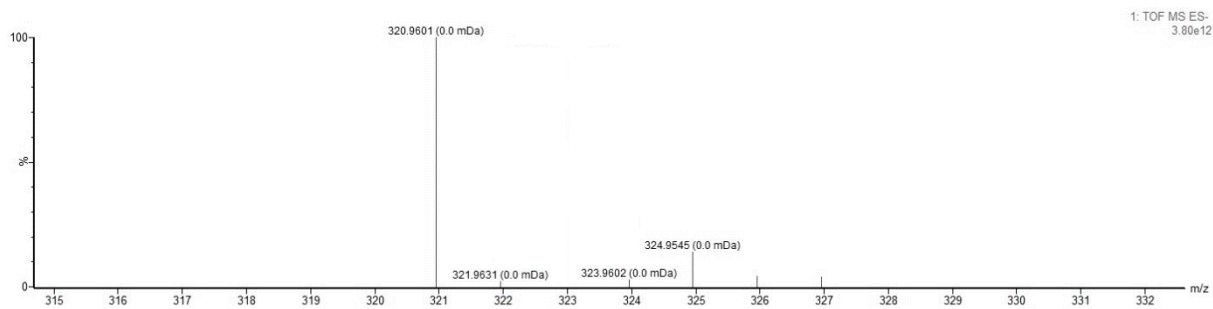

## COSY

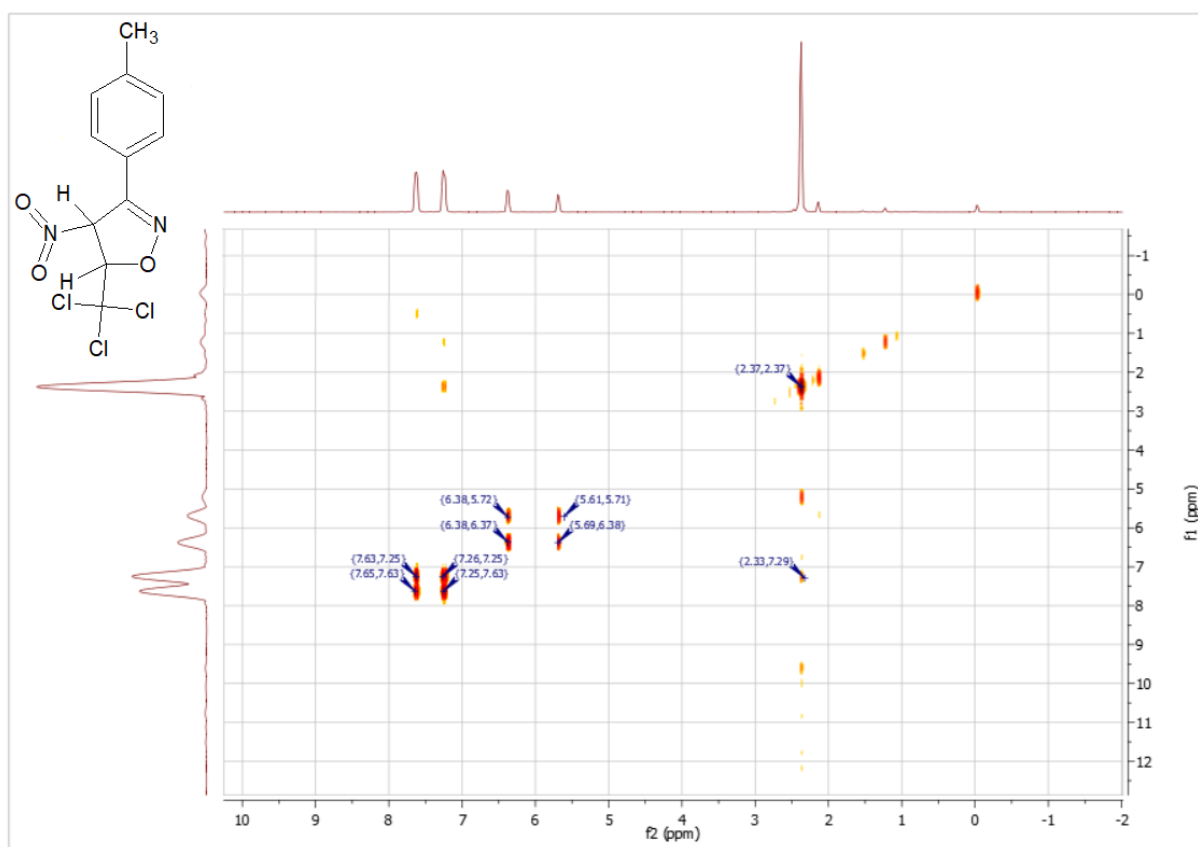

## NOESY

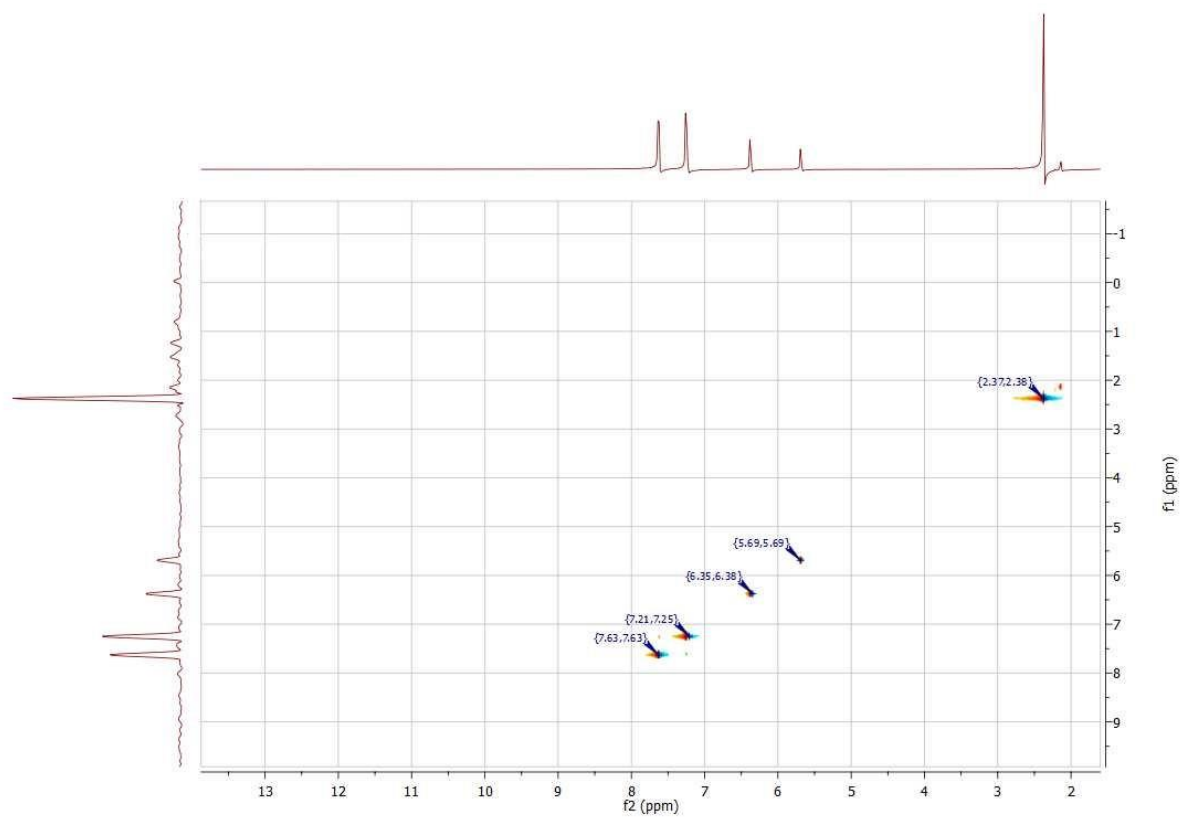

HSQC

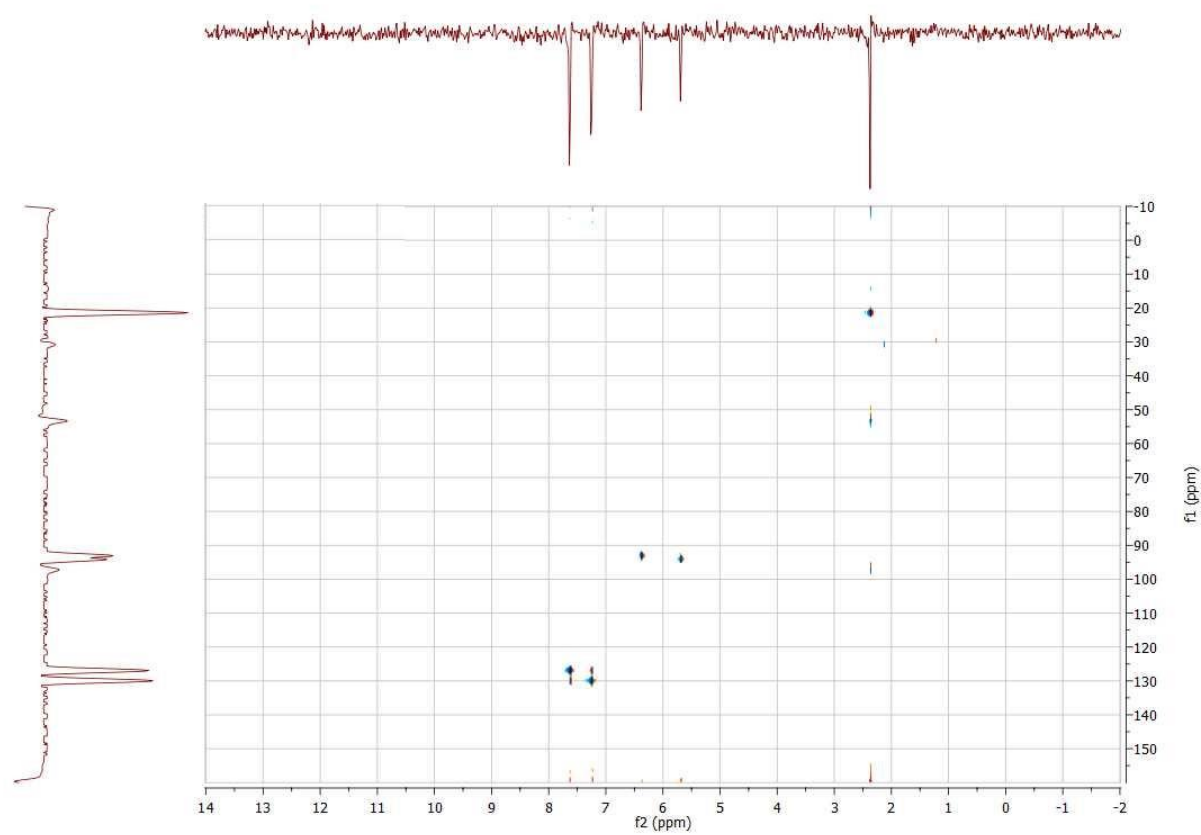



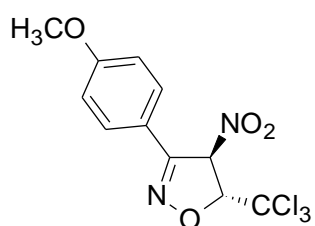

**4,5-*trans*-3-(4-methylphenyl)-4-nitro-5-trichloromethyl- $\Delta^2$ -isoxazoline (3b)**

$C_{12}H_9N_2O_4Cl_3$ . White crystal needles obtained in 43,07 % yield; m.p. 63 – 66°C from ethanol; IR:  $\nu$  = 1563 and 1349 ( $NO_2$ ), 1262 (-C-O-N-), 1609 (-C=N-), 815 ( $C(Cl_2)-Cl$ )  $cm^{-1}$ ; UV 277 nm;  $^1H$  NMR (400 MHz,  $CDCl_3$ ):  $\delta$  7.71 (d, 2H,  $J=9.00Hz$ ); 6.97 (d, 2H,  $J=9.00Hz$ ); 6.39 (d, 1H,  $J=3.91Hz$ ); 5.71 (d, 1H,  $J=3.91Hz$ ); 3.86 (s, 3H),  $^{13}C$  NMR (100 MHz,  $CDCl_3$ ):  $\delta$  160.55; 149.31; 126.91; 112.93; 92.24; 91.46; 53.6; HR-MS (ESI+): calculated for  $C_{12}H_9N_2O_4Cl_3$   $[M+H]^+ = 382.9345$ , found 382.9343;

IR

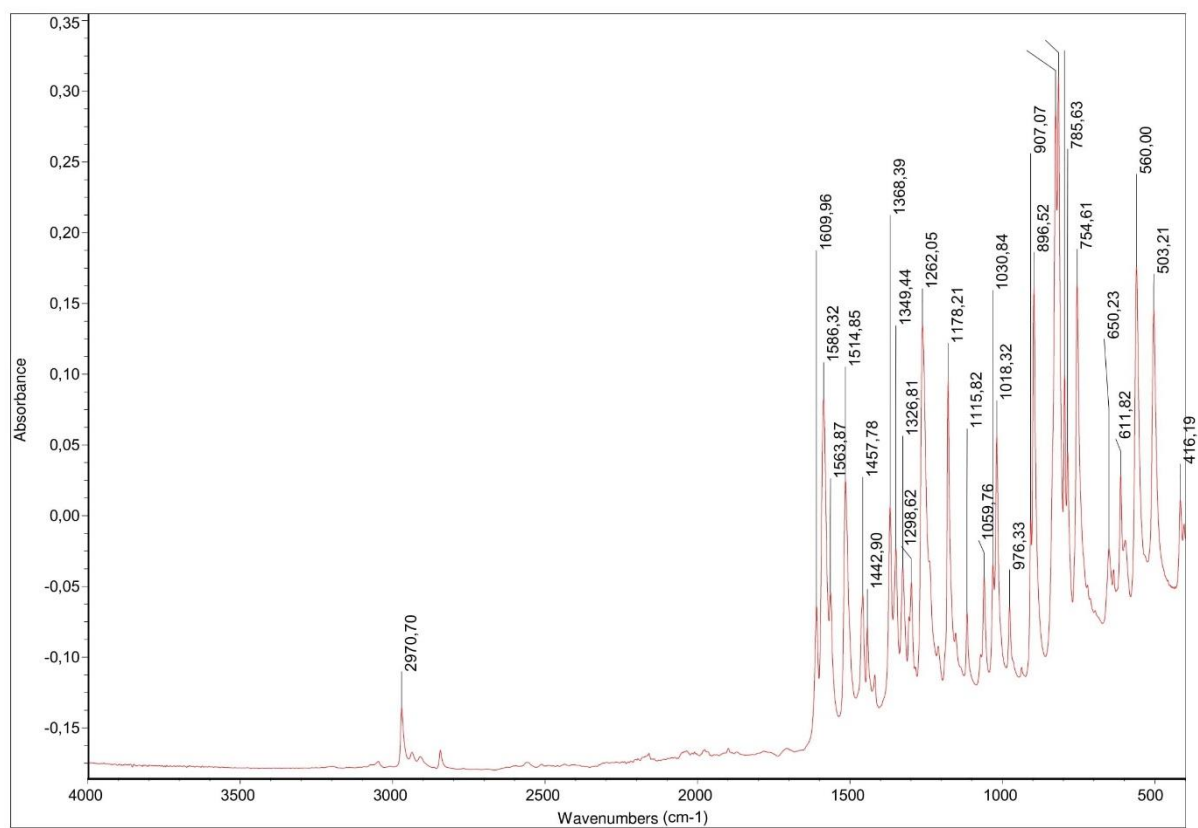

### <sup>1</sup>H NMR

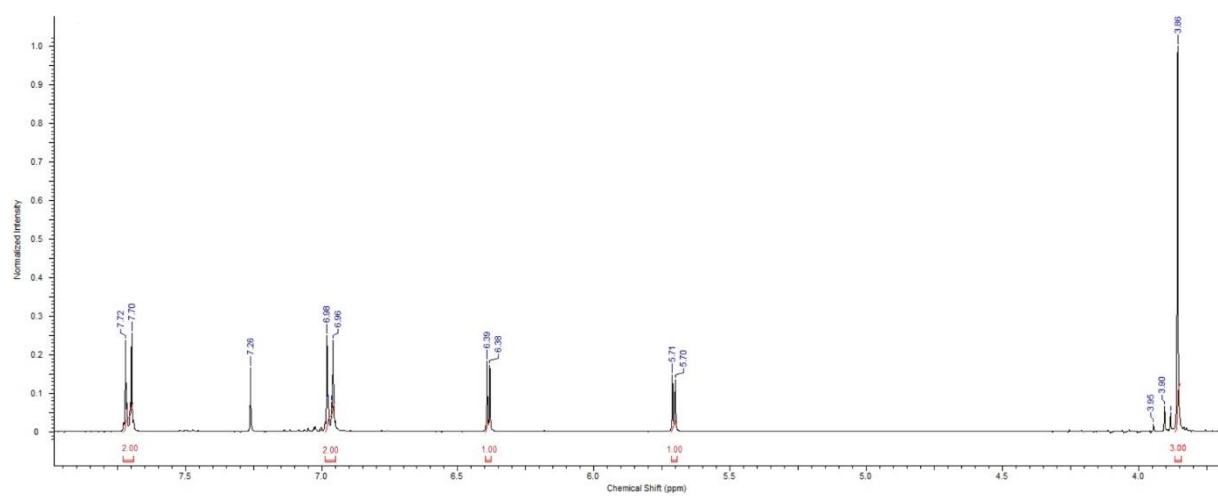

### <sup>13</sup>C NMR

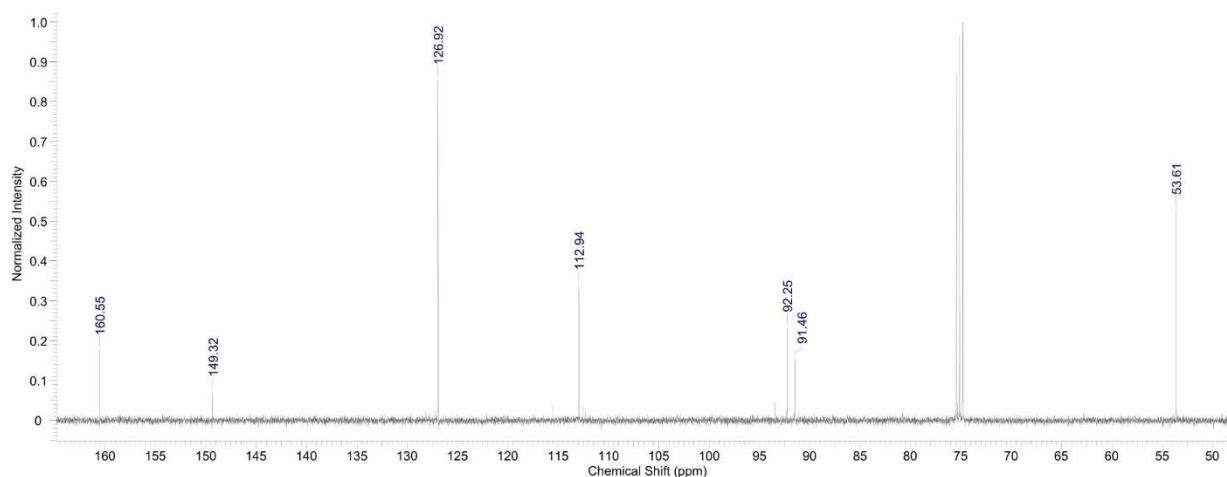

## HR-MS

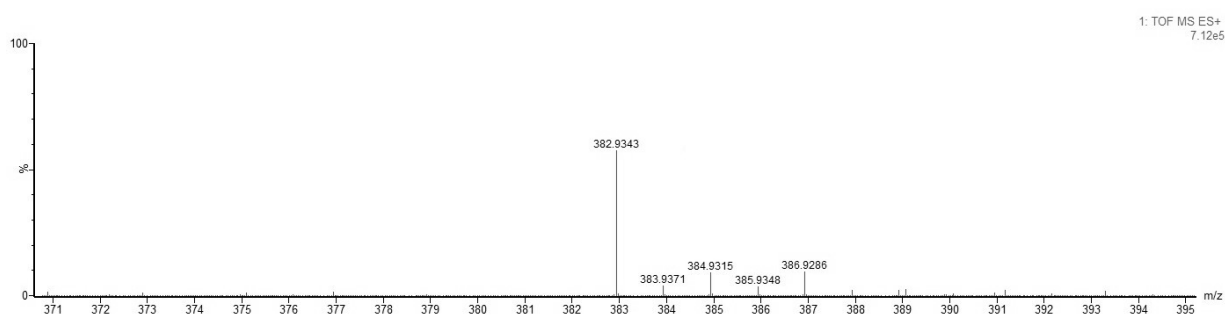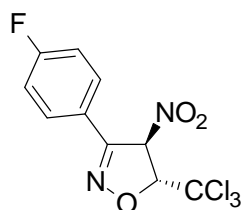

### 4,5-*trans*-3-(4-fluorophenyl)-4-nitro-5-trichloromethyl- $\Delta^2$ -isoxazoline (3c)

$C_{10}H_6N_2O_3Cl_3F$ . White crystal needles obtained in 70% yield; m.p. 104 – 106°C from ethanol; IR:  $\nu$  = 1563 and 1365 ( $NO_2$ ), 1256 ( $-C-O-N-$ ), 1600 ( $-C=N-$ ), 815 ( $C(Cl_2)-Cl$ )  $cm^{-1}$ ; UV 258 nm;  $^1H$  NMR (500 MHz,  $CDCl_3$ ):  $\delta$  7.75-7.78 (dd, 2H,  $J=5.09Hz$ ); 7.16 (t, 2H,  $J=8.61Hz$ ); 6.37 (d, 1H,  $J=3.91Hz$ ); 5.74 (d, 1H,  $J=3.91Hz$ );  $^{13}C$  NMR (100 MHz,  $CDCl_3$ ):  $\delta$  165.98 163.45 (d,  $J=253Hz$ ); 150.71; 129.36; 129.27; 116.81; 94.38; 92.95;  $^{19}F$  NMR (376 MHz):  $\delta$  -106.24, (m, 1F); HR-MS (ESI+): calculated for  $C_{10}H_6N_2O_3Cl_3F$   $[M+H]^+$  = 370.9145, found 370.9145;

## IR

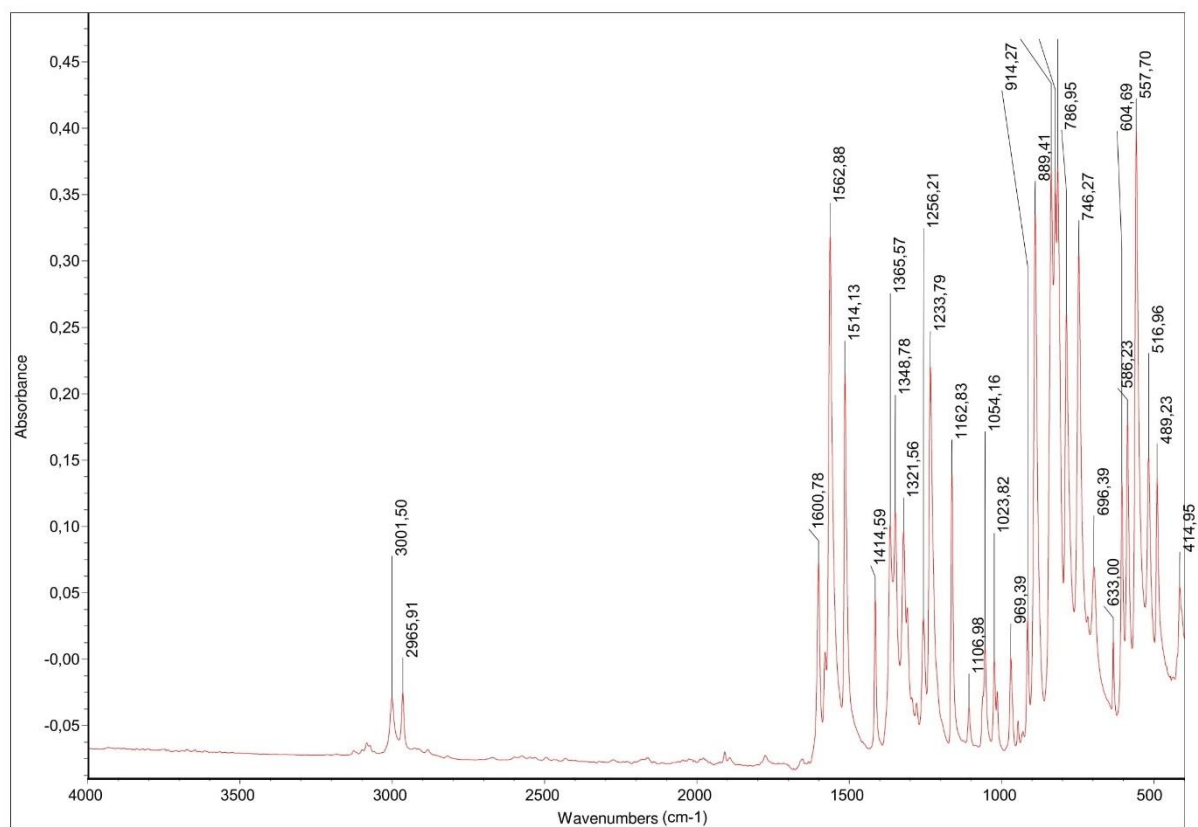

## <sup>1</sup>H NMR

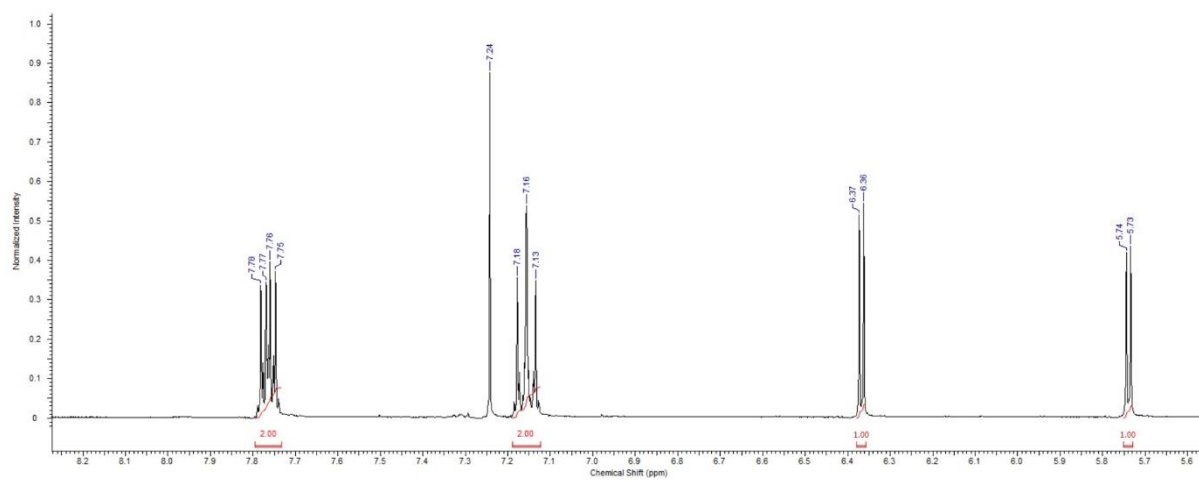

## <sup>13</sup>C NMR

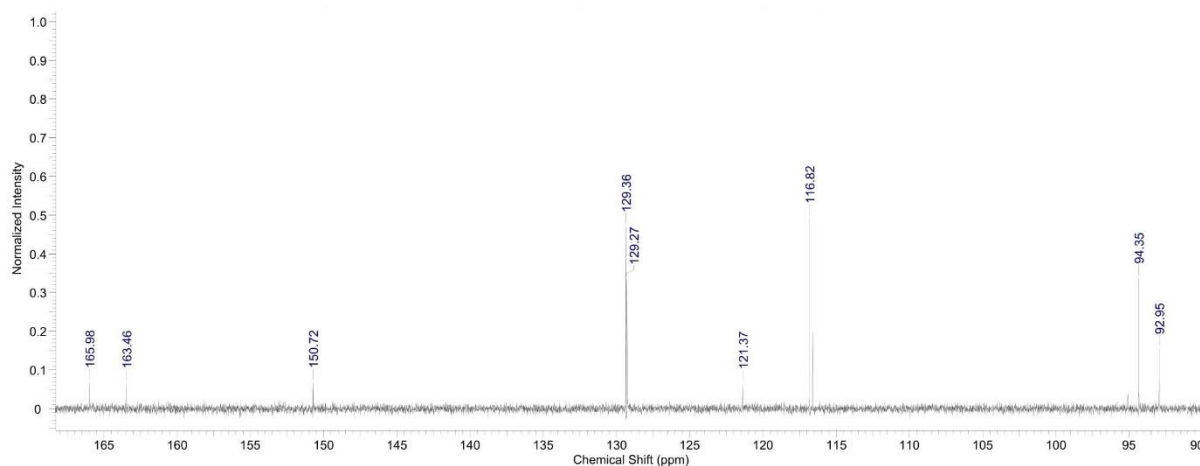

## HR-MS

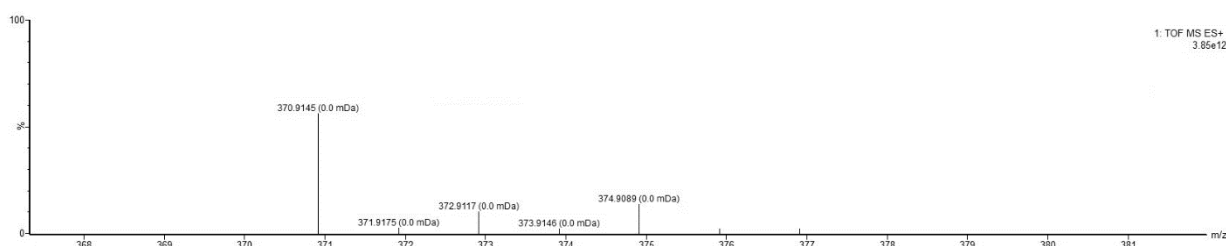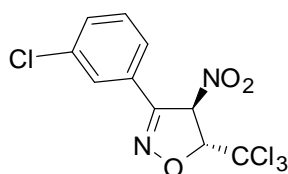

### 4,5-*trans*-3-(3-chlorophenyl)-4-nitro-5-trichloromethyl- $\Delta^2$ -isoxazoline (3d)

$C_{10}H_6N_2O_3Cl_4$ . White crystal needles obtained in 40 % yield; m.p. 58 – 61°C from ethanol; IR:  $\nu$  = 1557 and 1354 ( $NO_2$ ), 1252 ( $-C-O-N-$ ), 1591 ( $-C=N-$ ), 819 ( $C(Cl_2)-Cl$ )  $cm^{-1}$ ; UV 258 nm;  $^1H$  NMR (400 MHz,  $CDCl_3$ ):  $\delta$  7.79 (t, 1H,  $J=1.96Hz$ ); 7.62-7.64 (dd, 1H,  $J=1.17Hz$ ); 7.49-7.51 (dd, 1H,  $J=1.17Hz$ ); 7.42 (d, 1H); 6.38 (d, 1H,  $J=3.91Hz$ ); 5.77 (d, 1H,  $J=3.91Hz$ );  $^{13}C$  NMR (100 MHz,  $CDCl_3$ ):  $\delta$  150.67; 131.91; 130.55; 127.03; 126.87; 94.45; 92.51; HR-MS (ESI+): calculated for  $C_{10}H_6N_2O_3Cl_4$   $[M+H]^+ = 386.8850$ , found 386.8850;

## IR

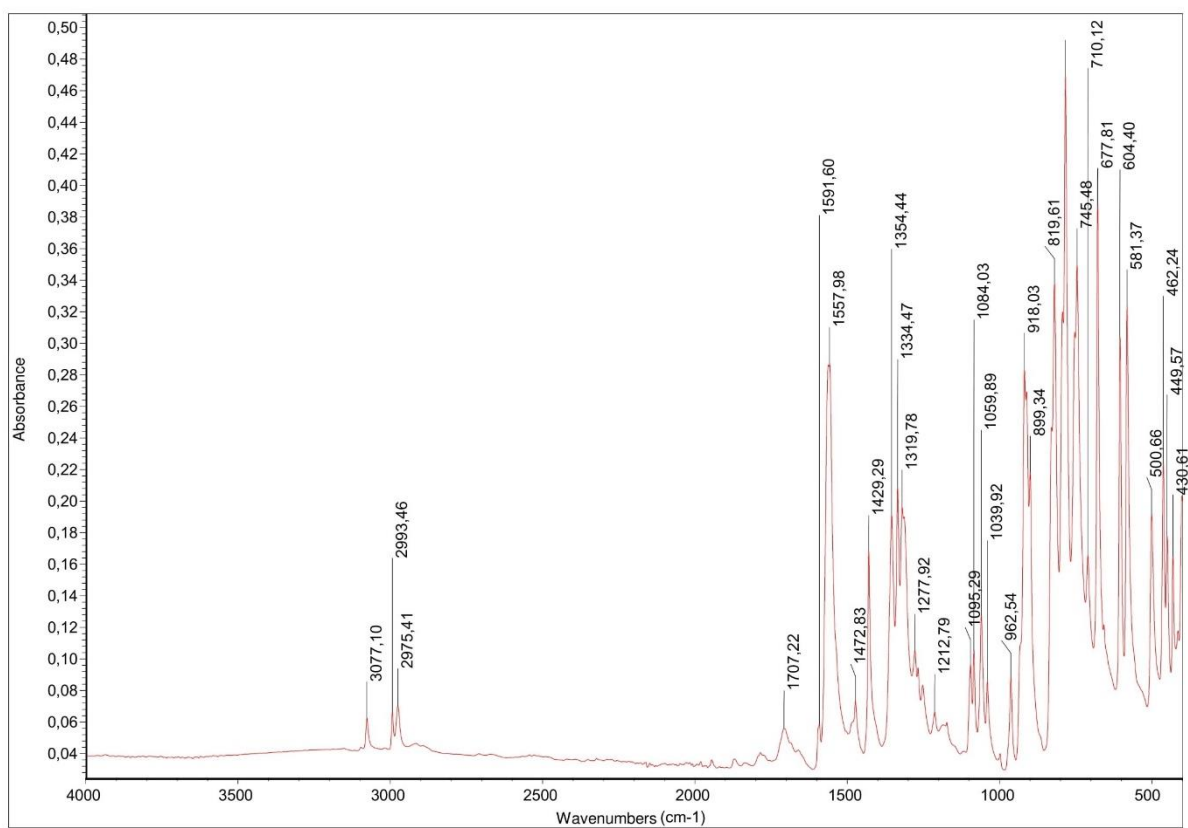

# <sup>1</sup>H NMR

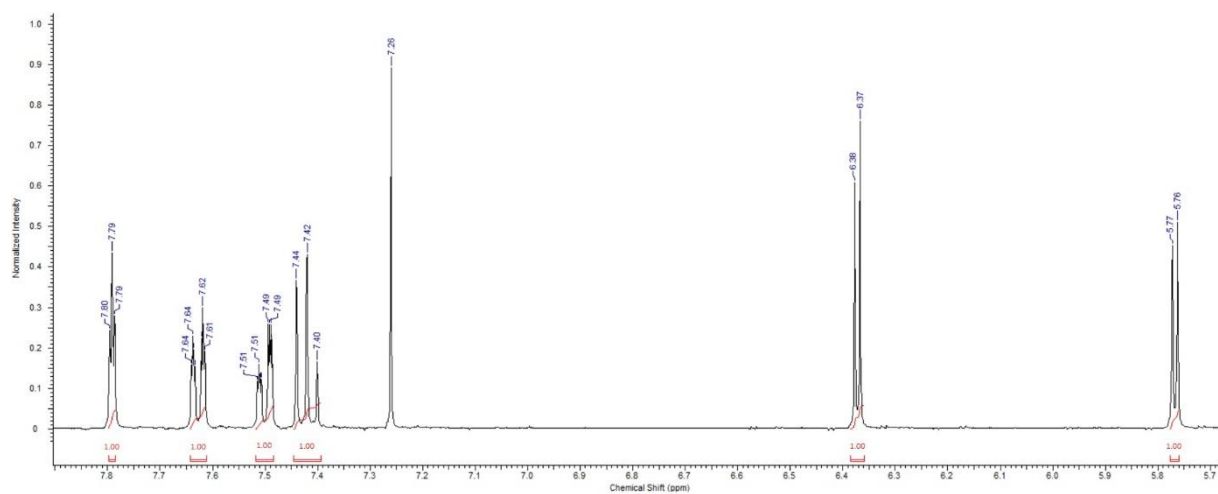

# <sup>13</sup>C NMR

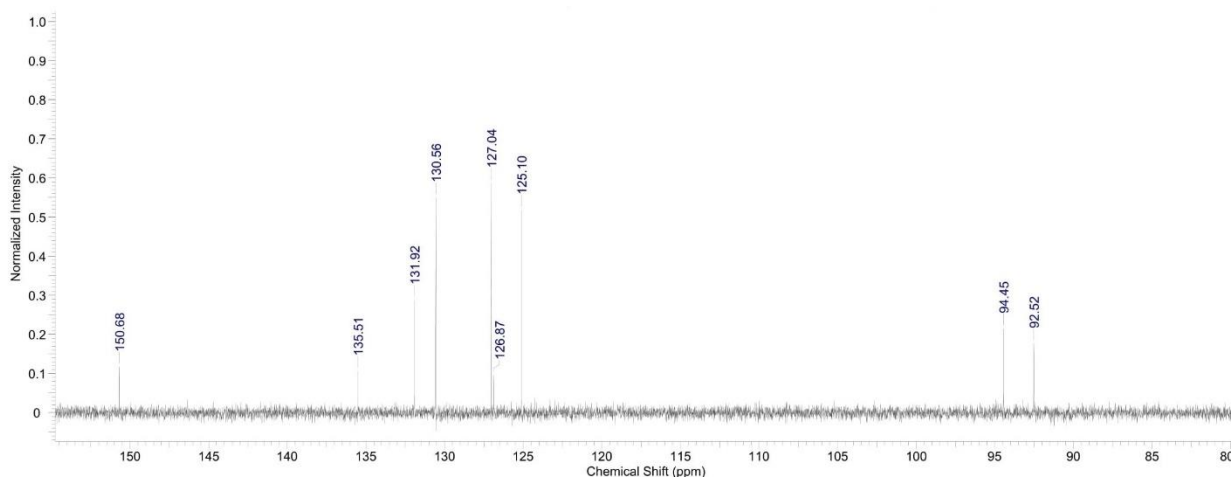

## HR-MS

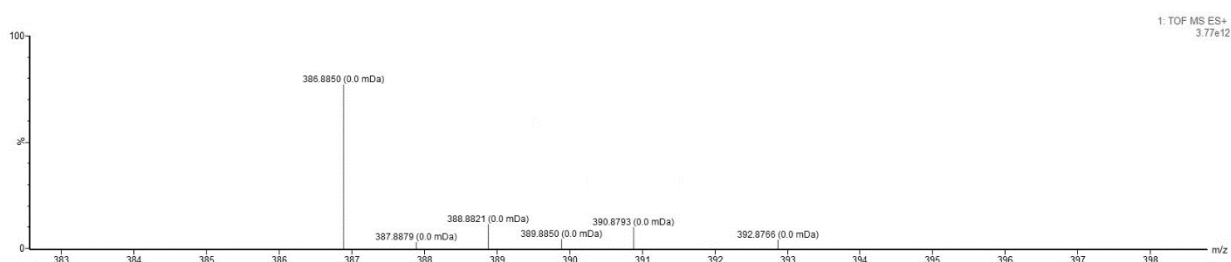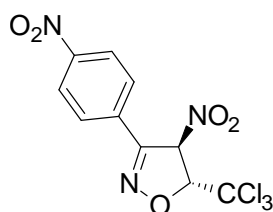

### 4,5-*trans*-3-(4-nitrophenyl)-4-nitro-5-trichloromethyl- $\Delta^2$ -isoxazoline (3e)

$C_{10}H_6N_3O_5Cl_3$ . White crystal needles obtained in 40% yield; m.p. 115 – 120°C from ethanol; IR:  $\nu$  = 1560 and 1341 ( $NO_2$ ), 1259 ( $-C-O-N-$ ), 1607 ( $-C=N-$ ), 817 ( $C(Cl_2)-Cl$ )  $cm^{-1}$ ; UV 283 nm;  $^1H$  NMR (400 MHz,  $CDCl_3$ ):  $\delta$  8.32-8.34 (m, 2H,  $J=1.96Hz$ ); 7.97-7.99 (m, 2H,  $J=1.96Hz$ ); 6.44 (d, 1H,  $J=3.91Hz$ ); 5.86 (d, 1H,  $J=3.91Hz$ ),  $^{13}C$  NMR (100 MHz,  $CDCl_3$ ):  $\delta$  150.3; 131.05; 128.4; 128.1; 124.5; 94.79; 92.02; HR-MS (ESI+): calculated for  $C_{10}H_6N_3O_5Cl_3$   $[M+H]^+ = 397.9090$ , found 397.9090;

## IR

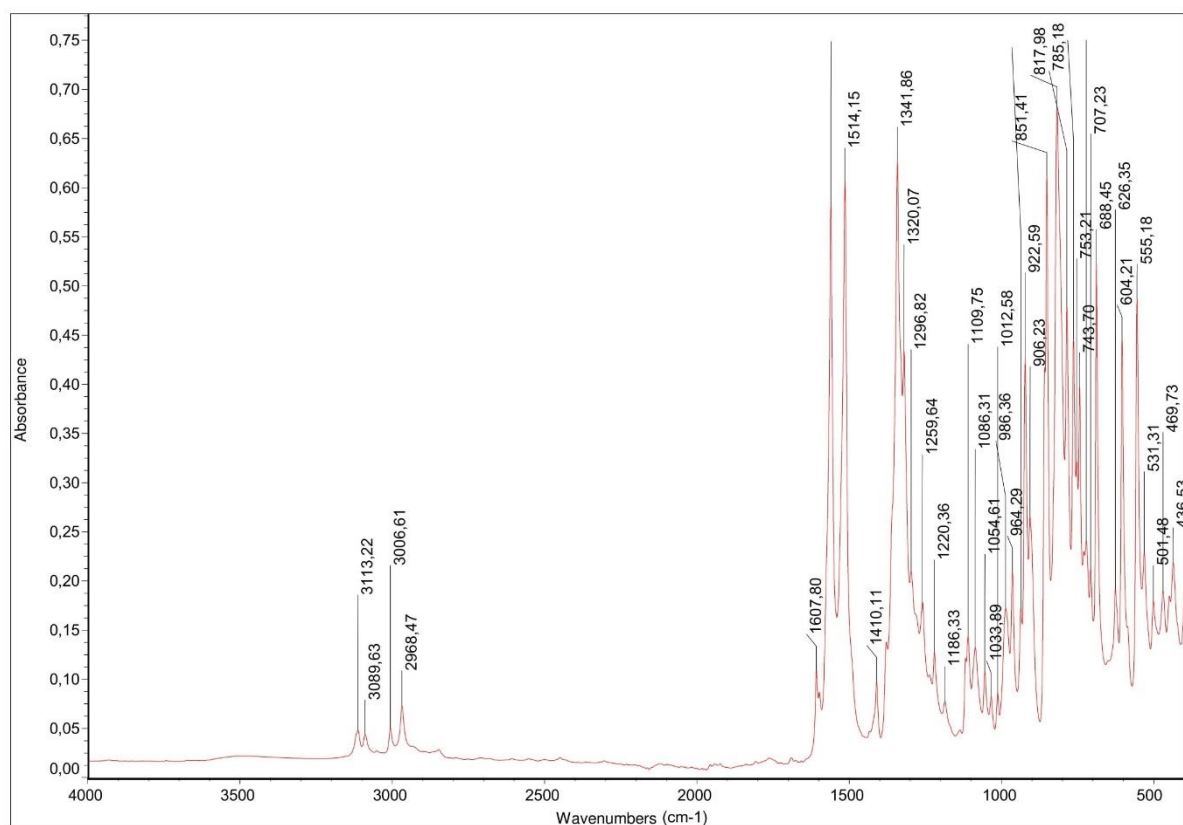

# <sup>1</sup>H NMR

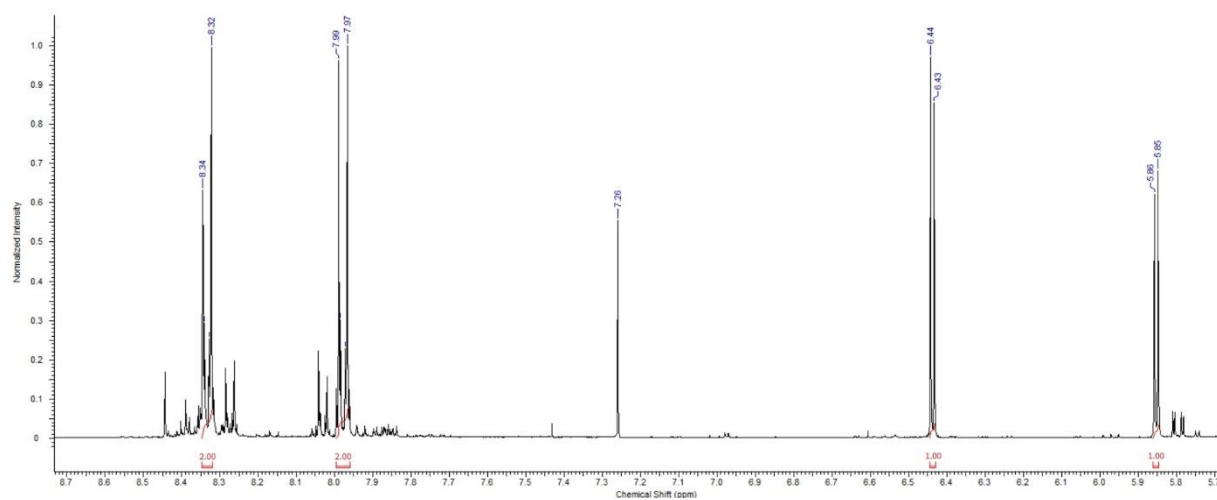

# <sup>13</sup>C NMR



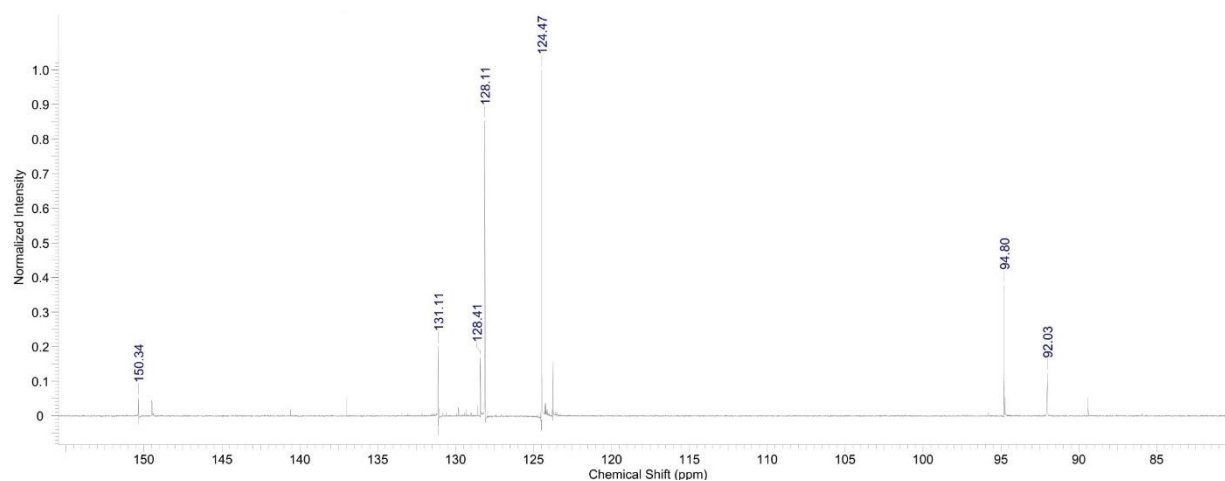

## HR-MS

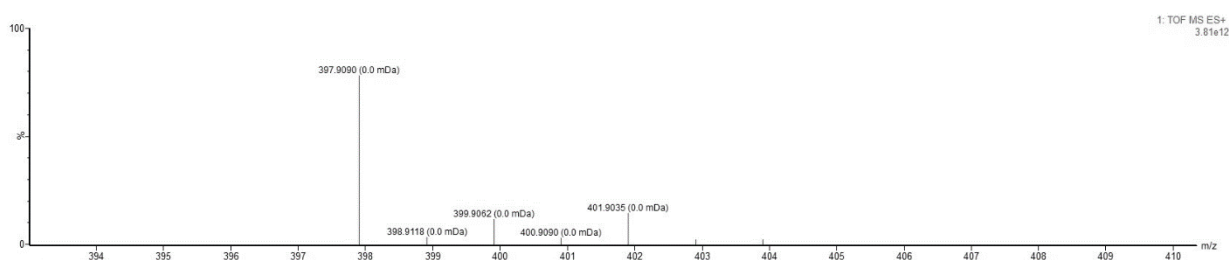

**Table S1.** Crystal X-Ray diffraction data for  $\Delta^2$ -isoxazoline (**3a**)

|                       |                       |
|-----------------------|-----------------------|
| Empirical formula     | $C_{11}H_9Cl_3N_2O_3$ |
| Formula weight        | 323.55                |
| Temperature/K         | 294.13(12)            |
| Crystal system        | triclinic             |
| Space group           | <i>P</i> -1           |
| <i>a</i> /Å           | 5.9745(3)             |
| <i>b</i> /Å           | 9.3795(4)             |
| <i>c</i> /Å           | 12.1947(5)            |
| $\alpha$ /°           | 95.047(4)             |
| $\beta$ /°            | 94.403(4)             |
| $\gamma$ /°           | 90.605(3)             |
| Volume/Å <sup>3</sup> | 678.60(5)             |
| <i>Z</i>              | 2                     |

|                                                |                                                               |
|------------------------------------------------|---------------------------------------------------------------|
| $\rho_{\text{calc}}/\text{g}/\text{cm}^3$      | 1.583                                                         |
| $\mu/\text{mm}^{-1}$                           | 6.181                                                         |
| F(000)                                         | 328.0                                                         |
| Crystal size/ $\text{mm}^3$                    | $0.3 \times 0.25 \times 0.08$                                 |
| Radiation                                      | $\text{CuK}\alpha$ ( $\lambda = 1.54184$ )                    |
| $2\theta$ range for data collection/ $^\circ$  | 7.3 to 152.196                                                |
| Index ranges                                   | $-7 \leq h \leq 7, -11 \leq k \leq 11, -15 \leq l \leq 15$    |
| Reflections collected                          | 9918                                                          |
| Independent reflections                        | 2778 [ $R_{\text{int}} = 0.0685, R_{\text{sigma}} = 0.0466$ ] |
| Data/parameters                                | 2778/173                                                      |
| Goodness-of-fit on $F^2$                       | 1.112                                                         |
| Final $R$ indexes [ $I \geq 2\sigma(I)$ ]      | $R_1 = 0.0509, wR_2 = 0.1342$                                 |
| Final $R$ indexes [all data]                   | $R_1 = 0.0625, wR_2 = 0.1709$                                 |
| Largest diff. peak/hole / $e \text{ \AA}^{-3}$ | 0.39/-0.45                                                    |

**Table S2.** Bond lengths ( $\text{\AA}$ ) and valence angles ( $^\circ$ ) for  $\Delta^2$ -isoxazoline (**3a**).

| Bond   |          | Angle    |          |
|--------|----------|----------|----------|
| C1-C2  | 1.533(3) | N1-O1-C2 | 109.8(2) |
| C1-C3  | 1.503(4) | C3-N1-O1 | 110.3(2) |
| C2-C4  | 1.522(4) | C3-C1-C2 | 101.5(2) |
| N1-C3  | 1.278(4) | O1-C2-C1 | 104.7(2) |
| N2-C1  | 1.513(3) | N1-C3-C1 | 112.9(2) |
| O1-N1  | 1.412(3) |          |          |
| O1-C2  | 1.437(3) |          |          |
| O2-N2  | 1.209(3) |          |          |
| O3-N2  | 1.217(3) |          |          |
| Cl1-C4 | 1.777(3) |          |          |
| Cl2-C4 | 1.757(3) |          |          |
| Cl3-C4 | 1.770(3) |          |          |

**Table S3.** Geometry of interactions in of crystal  $\Delta^2$ -isoxazoline (**3a**).

|               | D–H  | H...A | D...A    | <DHA | Symmetry code  |
|---------------|------|-------|----------|------|----------------|
| C1-H1...O3    | 0.98 | 2.38  | 3.224(3) | 144  | 1-x,1-y,1-z    |
| C2-H2...O3    | 0.98 | 2.47  | 3.57(3)  | 151  | -x,1-y,1-z     |
| C7-H7...O2    | 0.93 | 2.64  | 3.322(4) | 131  | -1+x,y,z       |
| C6-H6...O2    | 0.93 | 2.89  | 3.444(4) | 119  | -1+x,y,z       |
| C6-H6...O3    | 0.93 | 2.75  | 3.675(4) | 175  | -1-x,-1-y,-1-z |
| C1-H1...O3    | 0.98 | 2.38  | 3.224(3) | 144  | -1-x,-1-y,-1-z |
| C11-H11C...N1 | 0.96 | 2.88  | 3.415(4) | 116  | -x,-1-y,-z     |
| C7-H7...Cl2   | 0.93 | 3.02  | 3.790(4) | 142  | -1+x,-1+y,z    |
| O2...O3       | -    | -     | 3.094(4) | -    | -x,-1-y,-z     |
| O3...N2       | -    | -     | 2.996(3) | -    | -x,-1-y,-1-z   |
| O3...O3       | -    | -     | 2.985(3) | -    | -x,-1-y,-1-z   |
| Cl1...Cl1     | -    | -     | 3.610(1) | -    | -1-x,-y,-1-z   |

**Table S4.** Populations of the most relevant ELF valence basins of NOs **1a,c,d**, in average number of electrons,  $\bar{e}$ .

|           | <b>1c</b> (4-F) | <b>1d</b> (3-Cl) | <b>1a</b> (4-Me) |
|-----------|-----------------|------------------|------------------|
| V(O1,N2)  | 1.69            | 1.69             | 1.69             |
| V(N2)     |                 |                  |                  |
| V(N2,C3)  | 3.01            | 3.03             | 2.88             |
| V'(N2,C3) | 3.01            | 2.97             | 3.12             |
| V(C3,C3') | 2.47            | 2.47             | 2.48             |
| V(O1)     | 5.66            | 2.84             | 2.97             |
| V'(O1)    | 0.01            | 2.82             | 2.70             |

**Table S5.** B3LYP/6-31G(d) HOMO and LUMO energies used for the calculation of the global CDFT indices of NOs **1a-e**, in eV.

|  | HOMO | LUMO |
|--|------|------|
|--|------|------|

|                                |         |         |
|--------------------------------|---------|---------|
| <b>1a</b> (4-Me)               | -6.1715 | -1.2033 |
| <b>1b</b> (4-MeO)              | -5.8788 | -0.9709 |
| <b>1c</b> (4-F)                | -6.3579 | -1.3347 |
| <b>1d</b> (3-Cl)               | -6.6020 | -1.6444 |
| <b>1e</b> (4-NO <sub>2</sub> ) | -7.0513 | -3.0240 |
| TNP <b>2</b>                   | -8.4557 | -3.2308 |

**Table S6.** Nucleophilic  $P_k$ - Parr functions at the O1 and C3 atoms of NOs **1a,c,d**.

|           | O1   | C3    |
|-----------|------|-------|
| <b>1a</b> | 0.46 | -0.01 |
| <b>1c</b> | 0.48 | 0.01  |
| <b>1d</b> | 0.49 | 0.03  |

**Table S7.**  $\omega$ B97X-D/6-311G(d,p) electronic energies in gas phase and in tetrahydrofuran (THF), in a.u., of the reagents and stationary points involved in the 32CA reactions of NOs **1a-e** with TNP **2**.

|                   | Gas phase    | THF          |
|-------------------|--------------|--------------|
| TNP <b>2</b>      | -1701.175692 | -1701.181209 |
| <b>1a</b> (4-Me)  | -438.905608  | -438.911770  |
| <b>TS-o-a</b>     | -2140.069477 | -2140.078354 |
| <b>TS-m-a</b>     | -2140.066633 | -2140.075326 |
| <b>3a</b>         | -2140.159582 | -2140.167339 |
| <b>4a</b>         | -2140.156646 | -2140.168020 |
| <b>1b</b> (4-MeO) | -514.108307  | -514.116031  |
| <b>TS-o-b</b>     | -2215.273093 | -2215.283620 |
| <b>TS-m-b</b>     | -2215.270182 | -2215.280290 |
| <b>3b</b>         | -2215.362462 | -2215.371673 |
| <b>4b</b>         | -2215.359532 | -2215.372431 |
| <b>1c</b> (4-F)   | -498.826633  | -498.832821  |
| <b>TS-o-c</b>     | -2199.990093 | -2199.998886 |

|                              |              |              |
|------------------------------|--------------|--------------|
| <b>TS-m-c</b>                | -2199.987234 | -2199.996009 |
| <b>3c</b>                    | -2200.080840 | -2200.088552 |
| <b>4c</b>                    | -2200.077945 | -2200.089331 |
| <b>1d (3-Cl)</b>             | -859.193278  | -859.199210  |
| <b>TS-o-d</b>                | -2560.355678 | -2560.364305 |
| <b>TS-m-d</b>                | -2560.353197 | -2560.361861 |
| <b>3d</b>                    | -2560.447366 | -2560.455112 |
| <b>4d</b>                    | -2560.444574 | -2560.455945 |
| <b>1e (4-NO<sub>2</sub>)</b> | -604.075969  | -604.084758  |
| <b>TS-o-e</b>                | -2305.236783 | -2305.248301 |
| <b>TS-m-e</b>                | -2305.234645 | -2305.246355 |
| <b>3e</b>                    | -2305.329894 | -2305.340458 |
| <b>4e</b>                    | -2305.327068 | -2305.341280 |

**Table S8.**  $\omega$ B97X-D/6-311G(d,p) enthalpies (H, in a.u.), entropies (S, in cal·mol<sup>-1</sup>K<sup>-1</sup>), and Gibbs free energies (G, in a.u.), and the relative ones with respect to the separated reagents, computed at 25 °C in THF, of the reagents and stationary points involved in the 32CA reaction of NOs **1a-e** with TNP **2**.

|                   | H            | $\Delta$ H | S       | $\Delta$ S | G            | $\Delta$ G |
|-------------------|--------------|------------|---------|------------|--------------|------------|
| <b>TNP 2</b>      | -1701.115302 |            | 98.977  |            | -1701.162329 |            |
| <b>1a (4-Me)</b>  | -438.770319  |            | 95.140  |            | -438.815523  |            |
| <b>TS-o-a</b>     | -2139.870667 | 9.4        | 148.370 | -45.7      | -2139.941162 | 23.0       |
| <b>TS-m-a</b>     | -2139.867642 | 11.3       | 146.941 | -47.2      | -2139.937459 | 25.3       |
| <b>3a</b>         | -2139.955391 | -43.8      | 142.961 | -51.2      | -2140.023317 | -28.5      |
| <b>4a</b>         | -2139.956252 | -44.3      | 141.959 | -52.2      | -2140.023701 | -28.8      |
| <b>1b (4-MeO)</b> | -513.968497  |            | 97.479  |            | -514.014813  |            |
| <b>TS-o-b</b>     | -2215.069809 | 8.8        | 149.427 | -47.0      | -2215.140806 | 22.8       |
| <b>TS-m-b</b>     | -2215.066484 | 10.9       | 148.680 | -47.8      | -2215.137127 | 25.1       |
| <b>3b</b>         | -2215.153608 | -43.8      | 144.303 | -52.2      | -2215.222172 | -28.3      |
| <b>4b</b>         | -2215.154666 | -44.5      | 143.490 | -53.0      | -2215.222842 | -28.7      |
| <b>1c (4-F)</b>   | -498.728080  |            | 89.353  |            | -498.770535  |            |
| <b>TS-o-c</b>     | -2199.827946 | 9.7        | 142.690 | -45.6      | -2199.895743 | 23.3       |

|                   |              |       |         |       |              |        |
|-------------------|--------------|-------|---------|-------|--------------|--------|
| <b>TS-m-c</b>     | -2199.825038 | 11.5  | 141.861 | -46.5 | -2199.892441 | 25.4   |
| <b>3c</b>         | -2199.913252 | -43.8 | 136.082 | -52.2 | -2199.977909 | -28.3  |
| <b>4c</b>         | -2199.914310 | -44.5 | 135.676 | -52.7 | -2199.978774 | -28.8  |
| <b>1d (3-Cl)</b>  | -859.095438  |       |         | 92.2  |              | -859.1 |
| <b>TS-o-d</b>     | -2560.194223 | 10.4  | 144.178 | -47.0 | -2560.262727 | 24.4   |
| <b>TS-m-d</b>     | -2560.191869 | 11.8  | 144.450 | -46.7 | -2560.260501 | 25.8   |
| <b>3d</b>         | -2560.280777 | -43.9 | 139.291 | -51.9 | -2560.346958 | -28.5  |
| <b>4d</b>         | -2560.281889 | -44.6 | 138.253 | -52.9 | -2560.347578 | -28.9  |
| <b>1e (4-NO2)</b> | -603.967323  |       |         | 99.8  |              | -604.0 |
| <b>TS-o-e</b>     | -2305.064409 | 11.4  | 151.407 | -47.4 | -2305.136347 | 25.6   |
| <b>TS-m-e</b>     | -2305.062585 | 12.6  | 151.148 | -47.7 | -2305.134401 | 26.8   |
| <b>3e</b>         | -2305.152414 | -43.8 | 146.975 | -51.8 | -2305.222246 | -28.3  |
| <b>4e</b>         | -2305.153457 | -44.4 | 146.127 | -52.7 | -2305.222887 | -28.7  |

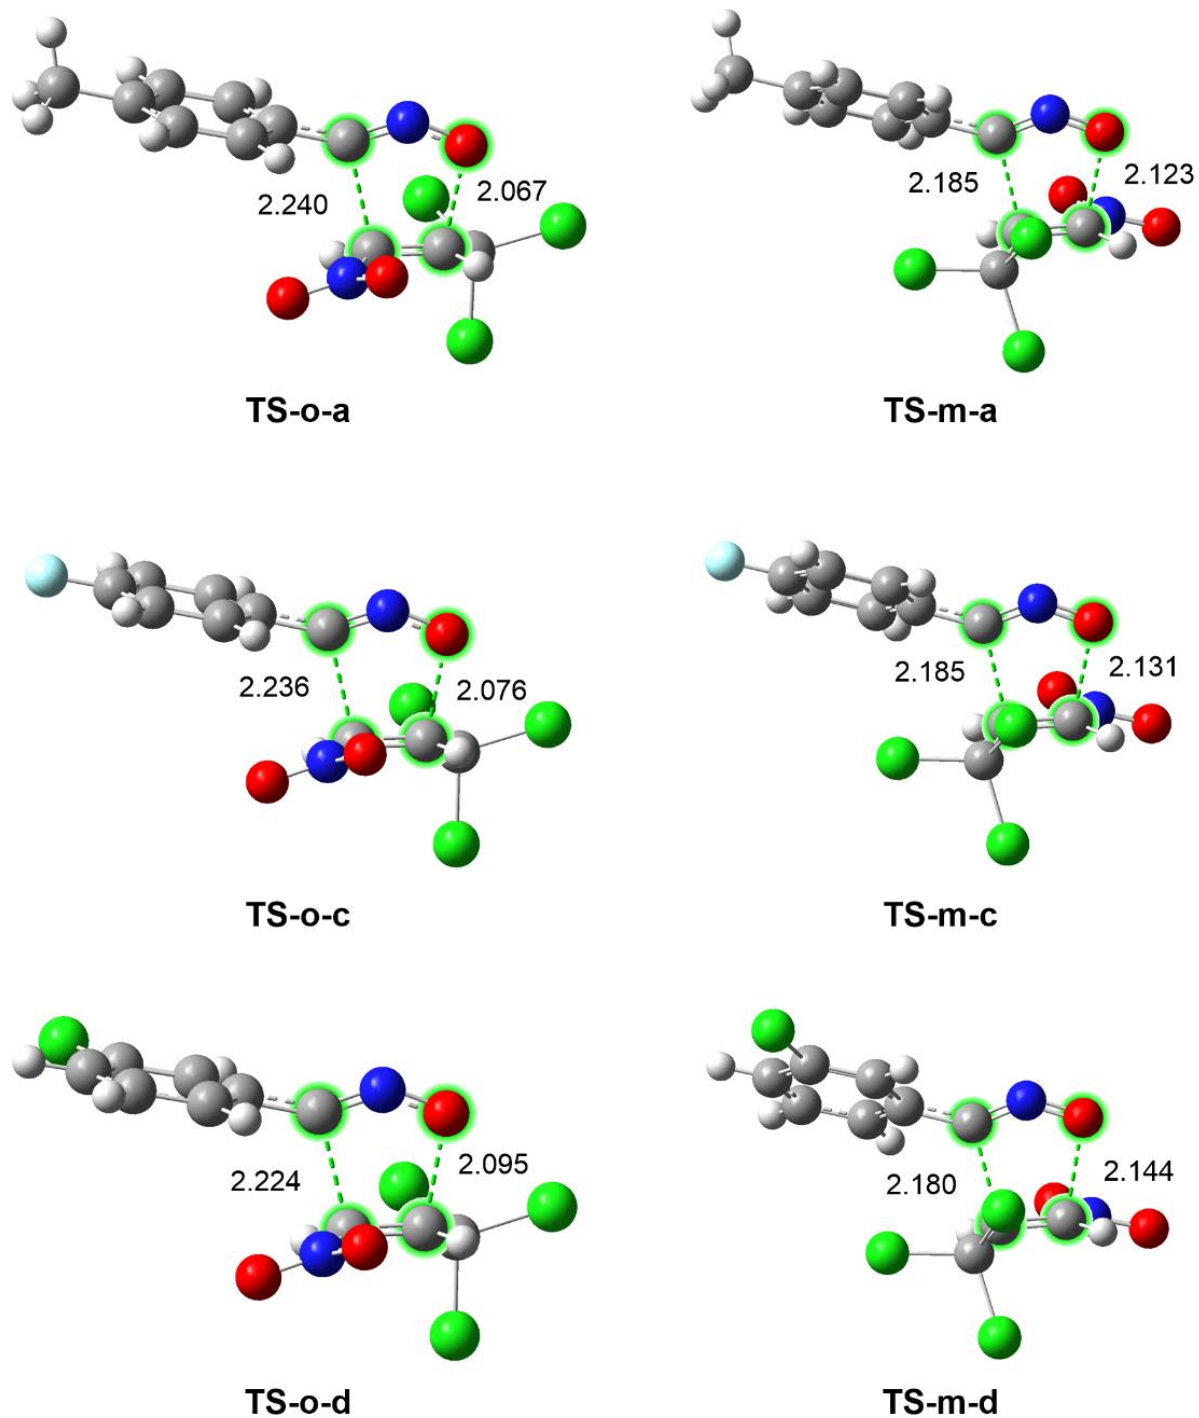

**Figure S1.**  $\omega$ B97X-D/6-311G(d,p) optimized geometries in THF of the regioisomeric TSs involved in the 32CA reaction of NOs **1a,c,d** with TNP **2**.

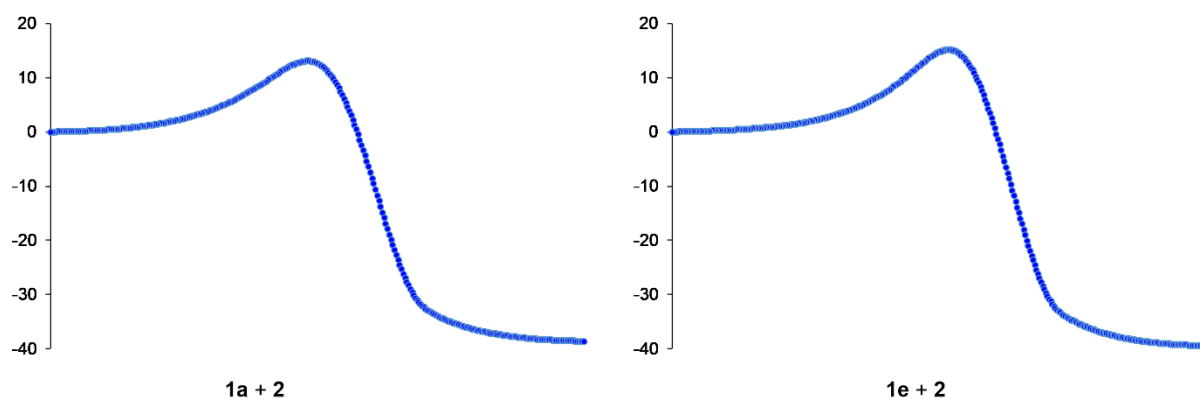

**Figure S2.**  $\omega$ B97X-D/6-311G(d,p) intrinsic reaction coordinate paths, in THF, of the 32CA reactions between NOs **1a,e** and TNP **2**. Relative energies with respect to the first structure of the reaction paths are given in kcal·mol<sup>-1</sup>.

## LITERATURE

1. Llopis, Q.; Guillaumot, G.; Phansavath, P.; Ratovelomanana-Vidal V. Enantioselective Synthesis of  $\alpha$ -Acetal- $\beta'$ -Amino Ketone Derivatives by Rhodium-Catalyzed Asymmetric Hydrogenation. *Org.Lett.* **2017** *19*, 6428–6431.
2. Liu, K.-Ch.; Shelton, B.R.; Howe, R.K. A particularly convenient preparation of benzohydroximinoyl chlorides (nitrile oxide precursors). *J. Org. Chem.* **1980**, *45*, 3916–3918.
3. Perekalin, W.; Lipina, E.S.; Berestovitskaya, V.M.; Efremov, D.A. *Nitroalkenes: Conjugated Nitrocompounds*, 1st ed.; Wiley: New York, USA, 1994.
4. Sheldrick, G.M. A short history of SHELX. *Acta Crystallogr. Sect. A* **2008**, *64*, 112–122.
5. Dolomanov, O. V.; Bourhis, L.J.; Gildea, R.J.; Howard, J.A.K.; Puschmann, H. OLEX2: A complete structure solution, refinement and analysis program. *J. Appl. Crystallogr.* 2009, *42*, 339–341.
